# Supplementary material
Source: PubMed Central journal article supplement (PMC7732924)
Supplement: 11357_2020_247_MOESM1_ESM.pdf [file 11357_2020_247_MOESM1_ESM.pdf]

## Association of inflammatory mediators with frailty status in older adults: results from a systematic review and meta-analysis

### GeroScience

Diego Marcos-Pérez · María Sánchez-Flores · Stefania Proietti · Stefano Bonassi · Solange Costa · Joao Paulo Teixeira · Juan Fernández-Tajes · Eduardo Pásaro · Blanca Laffon · Vanessa Valdiglesias

\*Correspondence: Blanca Laffon, Universidade da Coruña, Grupo DICOMOSA, Centro de Investigaciones Científicas Avanzadas (CICA), Departamento de Psicología, Facultad de Ciencias de la Educación, Campus Elviña s/n, 15071, A Coruña, Spain; E-mail: [blaffon@udc.es](mailto:blaffon@udc.es)

**Online Resource 1** Quality score criteria of the studies included in the meta-analyses. Detailed explanation on the score is provided in the Materials and Methods section

| Study reference                 | Total population size | Age matching | Gender matching | Frailty matching | Frailty measured by specialized personnel | Number of frailty groups | Total quality score |
|---------------------------------|-----------------------|--------------|-----------------|------------------|-------------------------------------------|--------------------------|---------------------|
| Arts <i>et al.</i> , (2015)     | 3                     | 3            | 1               | 1                | 1                                         | 1                        | 10                  |
| Barzilay <i>et al.</i> (2007)   | 3                     | 3            | 1               | 1                | 1                                         | 2                        | 13                  |
| Blaum <i>et al.</i> (2015)      | 3                     | 0            | 1               | 1                | 1                                         | 2                        | 8                   |
| Carcaillon <i>et al.</i> (2012) | 3                     | 0            | 1               | 1                | 3                                         | 2                        | 10                  |
| Collerton <i>et al.</i> (2012)  | 3                     | 3            | 1               | 1                | 1                                         | 2                        | 11                  |
| Darvin <i>et al.</i> (2014)     | 1                     | 2            | 2               | 1                | 1                                         | 2                        | 9                   |
| Fried <i>et al.</i> (2009)      | 3                     | 0            | 1               | 1                | 1                                         | 2                        | 8                   |
| Gale <i>et al.</i> (2013)       | 3                     | 0            | 3               | 1                | 1                                         | 1                        | 9                   |
| Hubbard <i>et al.</i> (2008)    | 2                     | 3            | 2               | 2                | 2                                         | 2                        | 13                  |
| Hubbard <i>et al.</i> (2009)    | 2                     | 3            | 2               | 2                | 2                                         | 2                        | 13                  |
| Hwang <i>et al.</i> (2015)      | 3                     | 1            | 3               | 1                | 1                                         | 2                        | 11                  |
| Kalyani <i>et al.</i> (2012)    | 1                     | 3            | 1               | 1                | 1                                         | 2                        | 9                   |

|                                   |   |   |   |   |   |   |    |
|-----------------------------------|---|---|---|---|---|---|----|
| Lee <i>et al.</i> (2016)          | 3 | 1 | 3 | 1 | 1 | 2 | 11 |
| Leng <i>et al.</i> (2002)         | 1 | 3 | 1 | 1 | 2 | 1 | 9  |
| Leng <i>et al.</i> (2004a)        | 1 | 3 | 1 | 1 | 1 | 1 | 8  |
| Leng <i>et al.</i> (2004b)        | 1 | 3 | 1 | 3 | 1 | 1 | 10 |
| Leng <i>et al.</i> (2007)         | 3 | 2 | 1 | 1 | 1 | 2 | 10 |
| Leng <i>et al.</i> (2009)         | 3 | 2 | 1 | 1 | 1 | 2 | 10 |
| Leng <i>et al.</i> , (2011)       | 2 | 3 | 1 | 1 | 1 | 2 | 10 |
| Lin <i>et al.</i> (2014)          | 3 | 3 | 3 | 1 | 1 | 1 | 12 |
| Marcos-Pérez <i>et al.</i> (2018) | 2 | 1 | 1 | 1 | 3 | 2 | 11 |
| Namioka <i>et al.</i> (2016)      | 2 | 3 | 2 | 1 | 1 | 2 | 11 |
| Qu <i>et al.</i> (2009)           | 1 | 3 | 1 | 3 | 1 | 1 | 10 |
| Sanchís <i>et al.</i> (2015)      | 3 | 3 | 2 | 1 | 1 | 1 | 11 |
| Saum <i>et al.</i> (2015)         | 3 | 2 | 3 | 1 | 1 | 2 | 12 |
| Tsai <i>et al.</i> (2013)         | 2 | 0 | 3 | 1 | 2 | 2 | 10 |
| Walston <i>et al.</i> (2002)      | 2 | 1 | 1 | 1 | 1 | 2 | 9  |
| Yang <i>et al.</i> (2018)         | 2 | 2 | 1 | 1 | 1 | 1 | 8  |
| Zhu <i>et al.</i> (2016)          | 3 | 0 | 3 | 1 | 1 | 2 | 10 |
