# Supplementary material
Source: PubMed Central journal article supplement (PMC7732924)

**Association of inflammatory mediators with frailty status in older adults: results from a systematic review and meta-analysis**

**GeroScience**

**Diego Marcos-Pérez · María Sánchez-Flores · Stefania Proietti · Stefano Bonassi · Solange Costa · Joao Paulo Teixeira · Juan Fernández-Tajes · Eduardo Pásaro · Blanca Laffon · Vanessa Valdiglesias**

\*Correspondence: Blanca Laffon, Universidade da Coruña, Grupo DICOMOSA, Centro de Investigaciones Científicas Avanzadas (CICA), Departamento de Psicología, Facultad de Ciencias de la Educación, Campus Elviña s/n, 15071, A Coruña, Spain; E-mail: [blaffon@udc.es](mailto:blaffon@udc.es)

**Online Resource 6** Forest plots for TNF $\alpha$  concentrations: (a) frailty vs. non-frailty groups; (b) pre-frailty vs. non-frailty groups; (c) frailty vs. pre-frailty groups

(a)

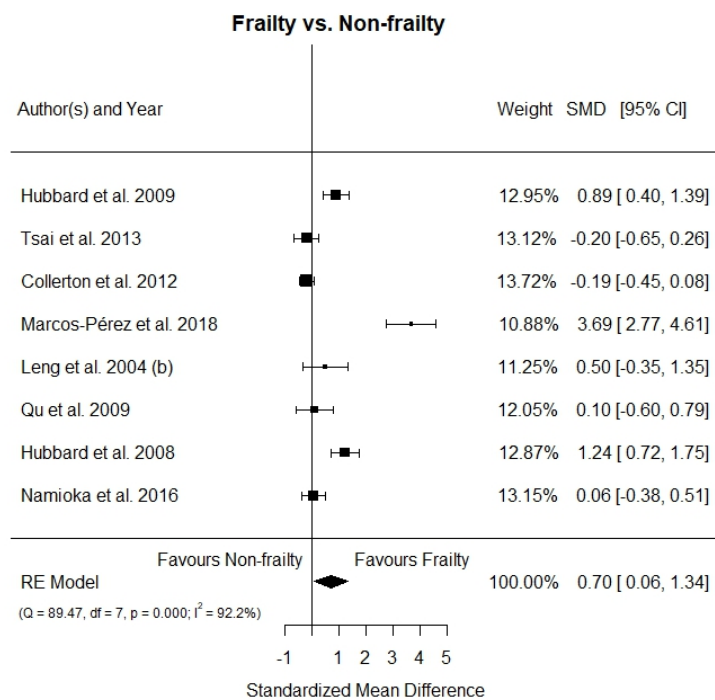

(b)

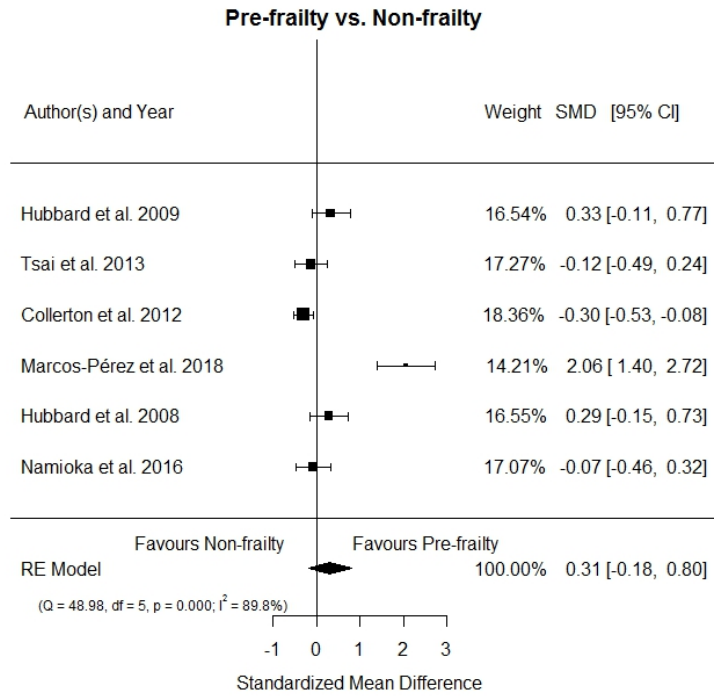

(c)

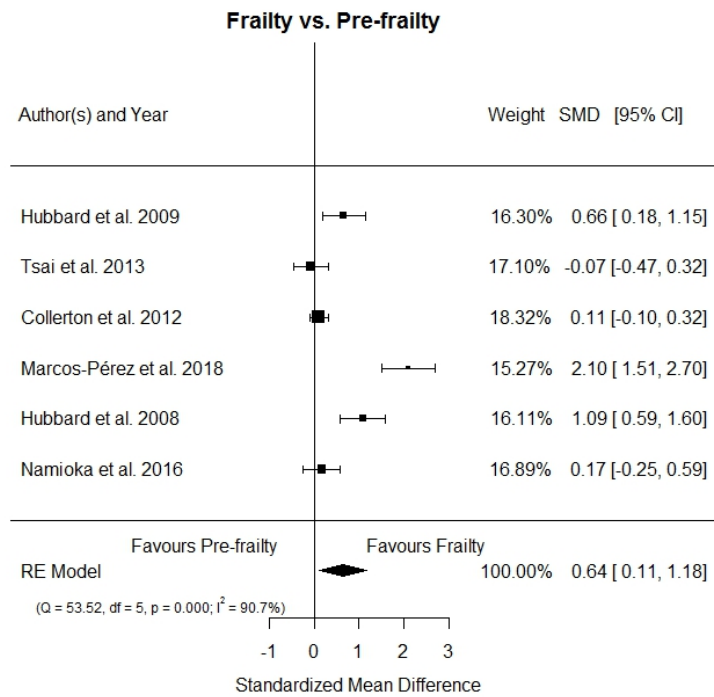

Supplement: 11357_2020_247_MOESM6_ESM.pdf [file 11357_2020_247_MOESM6_ESM.pdf]
